# Supplementary material for: A first-principles study of the structural, electronic and elastic properties of the FeO2–FeO2He system under high pressure
Source: Royal Society of Chemistry journal article supplement (doi:10.1039/d3cp02315j), 2023-01-01
Supplement: d3cp02315j1.pdf [file d3cp02315j1.pdf]

Supplementary Material for

**First-principles study of the structural, electronic and elastic properties of FeO<sub>2</sub>-  
FeO<sub>2</sub>He system under high pressure**

Haibo Liu <sup>a, \*</sup>, Lei Liu <sup>b, \*</sup>, Cunlin Xin <sup>c</sup>, Longxing Yang <sup>d</sup>, Xiaoyu Gu <sup>b</sup>

<sup>a</sup> Key Laboratory of Geoscience Big Data and Deep Resource of Zhejiang Province,  
School of Earth Sciences, Zhejiang University, Hangzhou 310027, China

<sup>b</sup> United Laboratory of High-Pressure Physics and Earthquake Science, Institute of  
Earthquake Forecasting, China Earthquake Administration, Beijing 100036, China

<sup>c</sup> College of Geography and Environmental Science, Northwest Normal University,  
Lanzhou 730070, China

<sup>d</sup> State Key Laboratory of Geological Processes and Mineral Resources, School of Earth  
Sciences and Resources, China University of Geosciences, Beijing 100083, China

\* Corresponding author: haibo@zju.edu.cn (H. Liu); liulei@ief.ac.cn (L. Liu)

This Supplementary Material includes:

Table S1

Figures S1 to S12

References

**Table S1.** Comparison of the results of FeO<sub>2</sub> and FeO<sub>2</sub>He in this study with previous results.

| FeO <sub>2</sub> |              |              |                            |                             |            |            |            |            |        |                                      |
|------------------|--------------|--------------|----------------------------|-----------------------------|------------|------------|------------|------------|--------|--------------------------------------|
| <i>P</i> (GPa)   | <i>T</i> (K) | <i>a</i> (Å) | <i>V</i> (Å <sup>3</sup> ) | $\rho$ (g/cm <sup>3</sup> ) | <Fe-O> (Å) | <O-O> (Å)  | O-Fe-O (°) | Fe-O-O (°) | Method | Reference                            |
| 76               |              | 4.363        | 83.04                      | 7.026                       |            |            |            |            | Exp    |                                      |
| 76               |              | 4.331        | 81.23                      |                             |            |            |            |            | Sim    |                                      |
| 76               | 273          |              |                            |                             | 1.792      | 1.937      | 95.6       | 99.1       | Exp    | Hu et al., 2016                      |
| 76               | 0            |              |                            |                             | 1.781      | 2.077      | 96.52      | 96.28      | Sim    |                                      |
| 76               |              |              |                            |                             | 1.808      | 1.896      | 95.26      | 99.92      | Exp    | Hu et al., 2016<br>Jang et al., 2017 |
| 76               |              | 4.364        | 83.115                     |                             |            |            |            |            | Exp    | Lu et al., 2018                      |
| 76               |              | 4.364        | 83.104                     |                             | 1.787      | 2.232      |            |            | Sim    | Lu et al., 2018                      |
| 76               | 0            | 4.364        | 83.105                     | 7.021                       | 1.794      | 2.104      | 96.581     | 96.659     | Sim    | this study                           |
| $\Delta$ (%)     |              | 0~0.76       | 0~2.31                     | 0.07                        | 0.11~0.77  | 1.30~10.97 | 0.06~1.39  | 0.39~3.26  |        |                                      |
| 119              |              |              | 76.21                      |                             | 1.75       | 1.99       |            |            | Sim    | Shorikov et al., 2018                |
| 119              | 0            |              | 76.678                     |                             | 1.755      | 1.995      |            |            | Sim    | this study                           |
| $\Delta$ (%)     |              |              | 0.61                       |                             | 0.29       | 0.25       |            |            |        |                                      |

  

| FeO <sub>2</sub> He |              |              |            |            |             |        |                    |  |  |  |
|---------------------|--------------|--------------|------------|------------|-------------|--------|--------------------|--|--|--|
| <i>P</i> (GPa)      | <i>T</i> (K) | <i>a</i> (Å) | <Fe-O> (Å) | O-Fe-O (°) | Fe-O-Fe (°) | Method | Reference          |  |  |  |
| 135                 | 0            | 4.32         | 1.87       | 70.53      | 109.47      | Sim    | Zhang et al., 2018 |  |  |  |
| 135                 | 0            | 4.32         | 1.87       | 70.53      | 109.47      | Sim    | this study         |  |  |  |
| $\Delta$ (%)        |              | 0            | 0          | 0          | 0           |        |                    |  |  |  |

Exp = Experiment; Sim = Simulation.

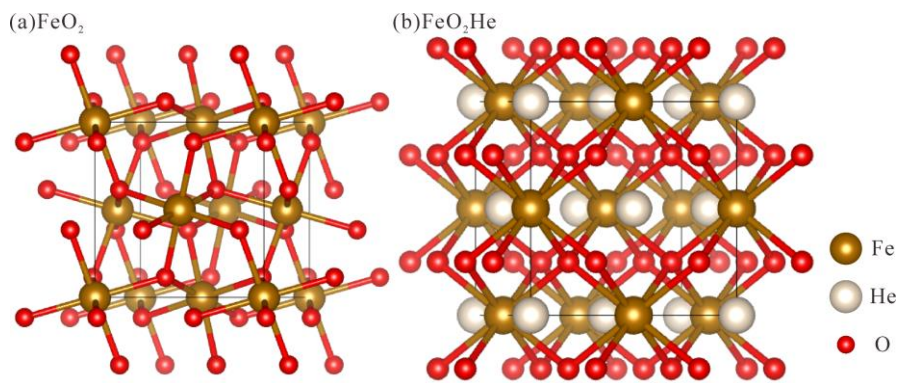

**Fig. S1.** Crystal structures of (a)  $\text{FeO}_2$  and (b)  $\text{FeO}_2\text{He}$ .

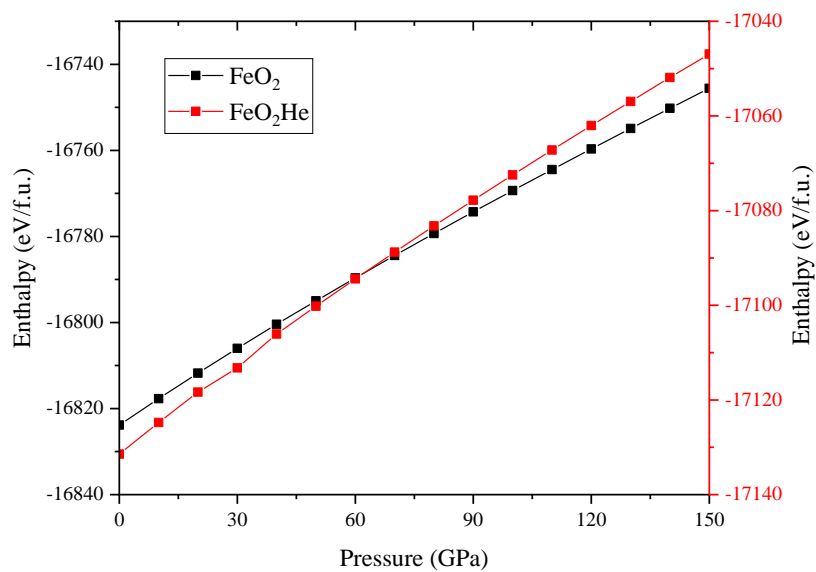

**Fig. S2.** Enthalpy of  $\text{FeO}_2$  and  $\text{FeO}_2\text{He}$  at different pressures.

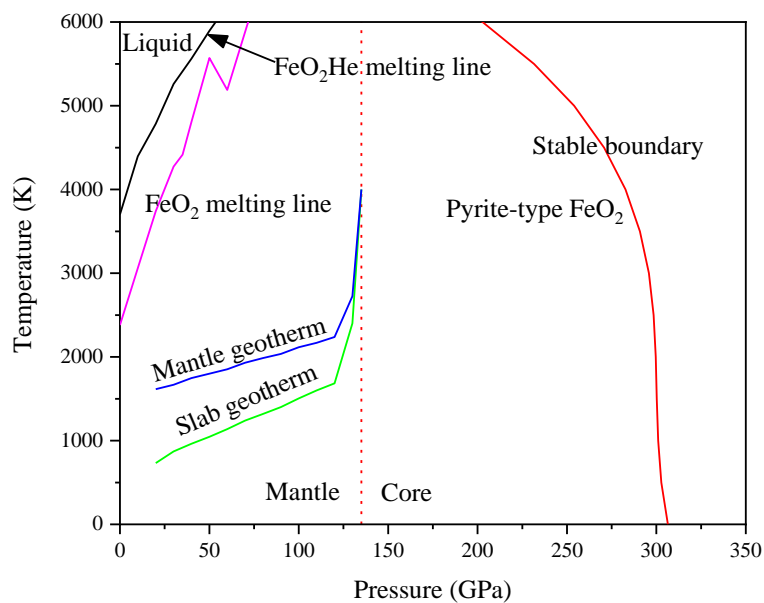

**Fig. S3.** Phase diagram of  $\text{FeO}_2$  and  $\text{FeO}_2\text{He}$  at high temperature and high pressure. The

melting line of FeO<sub>2</sub> and FeO<sub>2</sub>He are obtained by the empirical formula based on the elastic constant (Fine et al., 1984), and the relationship between the melting point and the elastic constant for the cubic system is  $T_m = [553K + (5.91K/GPa)c_{11}] \pm 300K$ . Geotherm data for the normal mantle and cold slab are derived from Litasov and Ohtani (2002) and Duan et al. (2018). The stable boundary data of pyrite type FeO<sub>2</sub> are derived from Zhang et al. (2017).

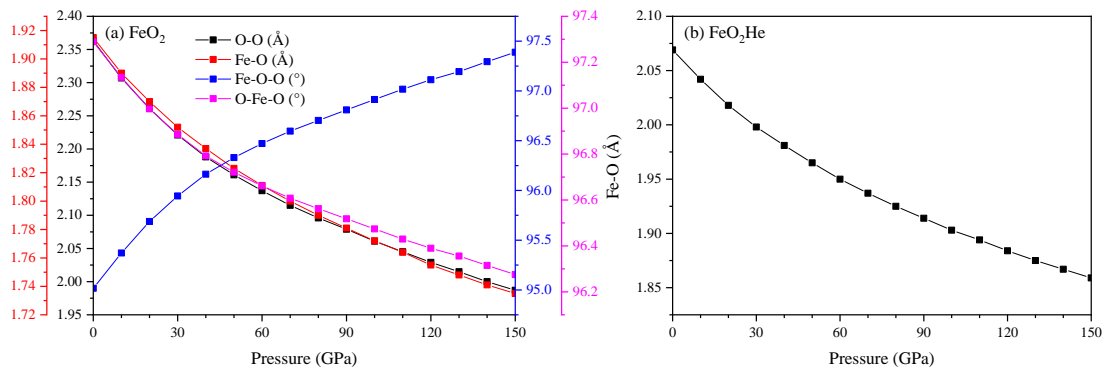

**Fig. S4.** Bond length and bond angle of (a) FeO<sub>2</sub> and (b) FeO<sub>2</sub>He at different pressures.

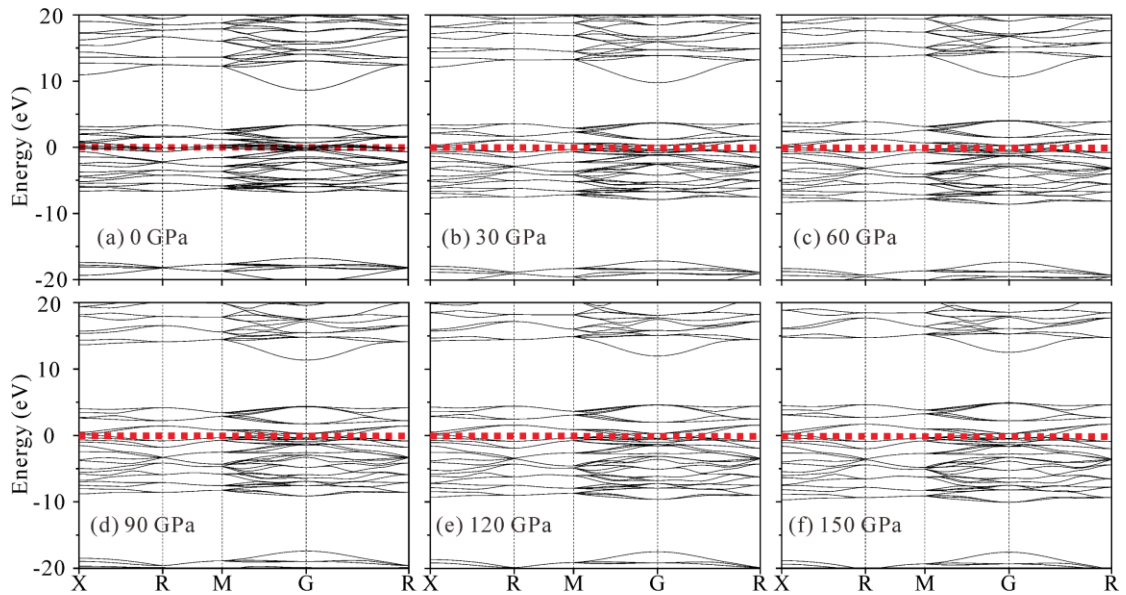

**Fig. S5.** Energy band structure of FeO<sub>2</sub> at different pressures. The red horizontal dashed line represents the Fermi level position (level = 0 eV).

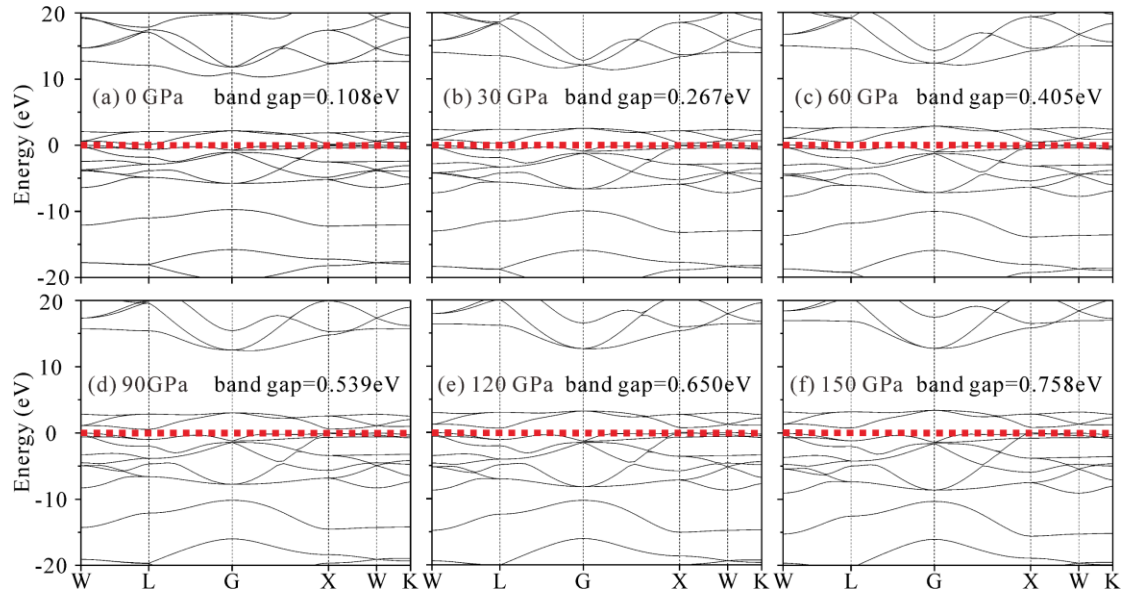

**Fig. S6.** Energy band structure of FeO<sub>2</sub>He at different pressures. The red horizontal dashed line represents the Fermi level position (level = 0 eV).

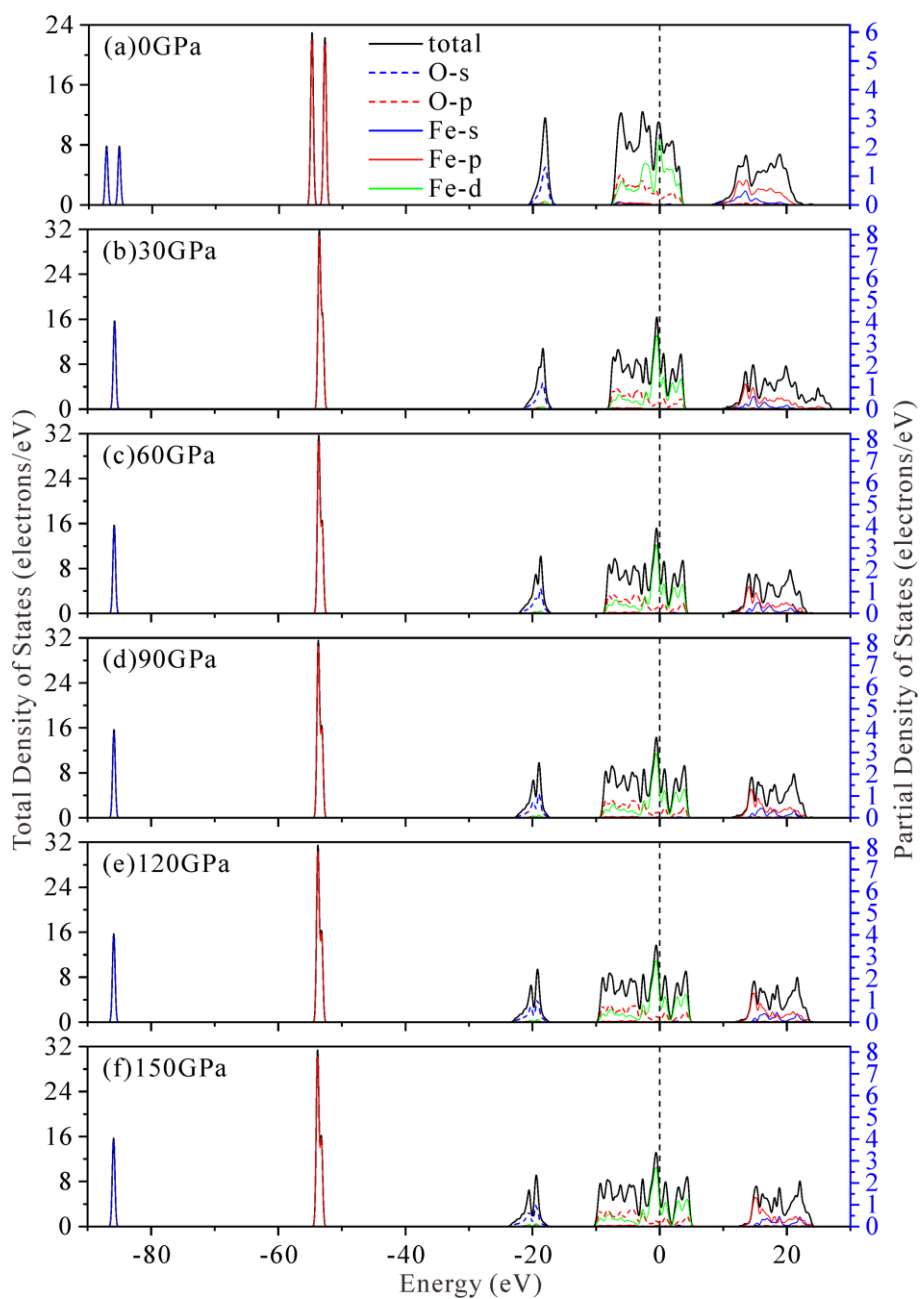

**Fig. S7.** Density of states of FeO<sub>2</sub> at different pressures. The black vertical dotted line represents the Fermi level position (level = 0 eV). The double peaks at -90–80 eV and -60–50 eV at 0 GPa are generated by spin-up and spin-down electrons, respectively.

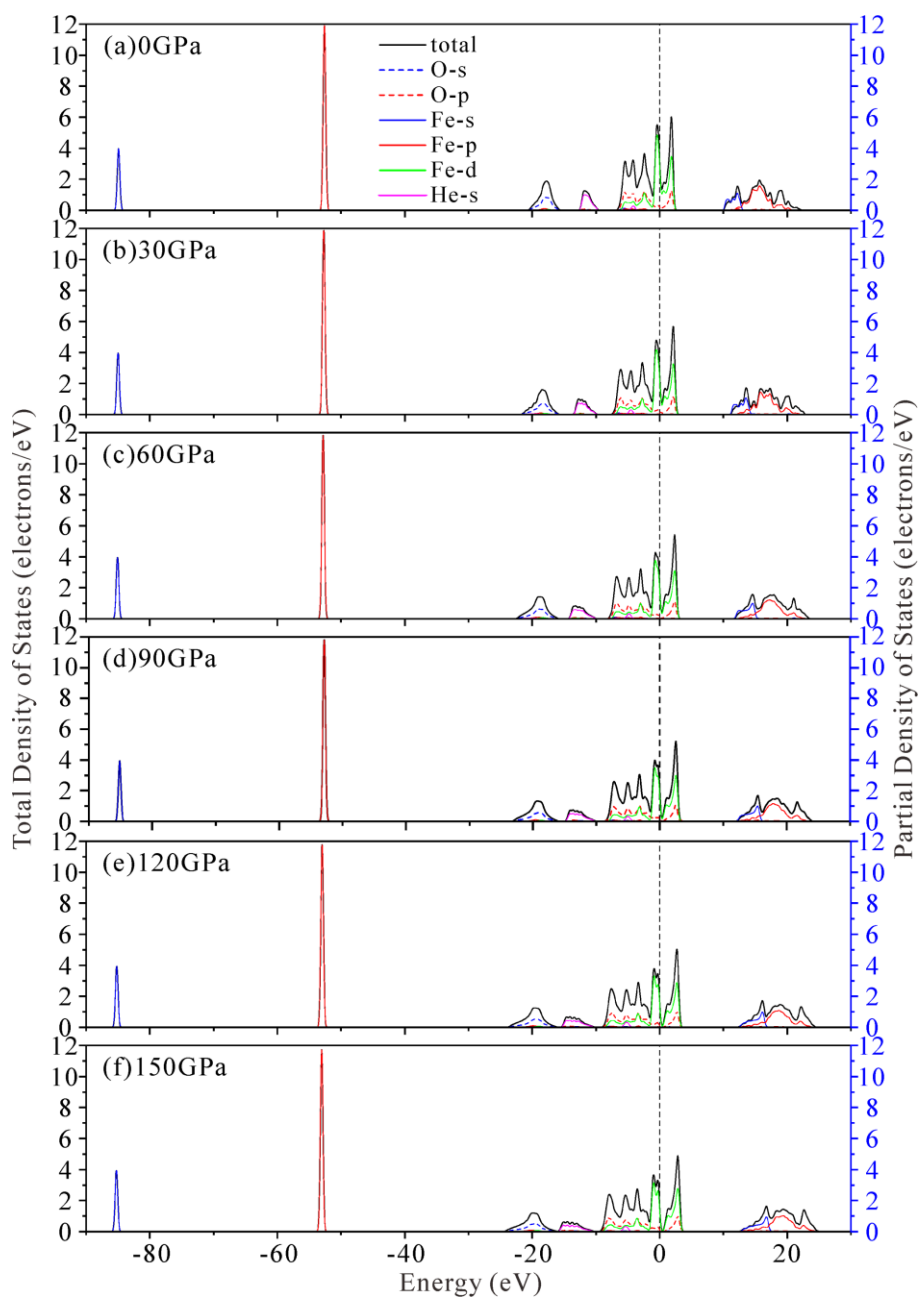

**Fig. S8.** Density of states of  $\text{FeO}_2\text{He}$  at different pressures. The black vertical dotted line represents the Fermi level position (level = 0 eV).

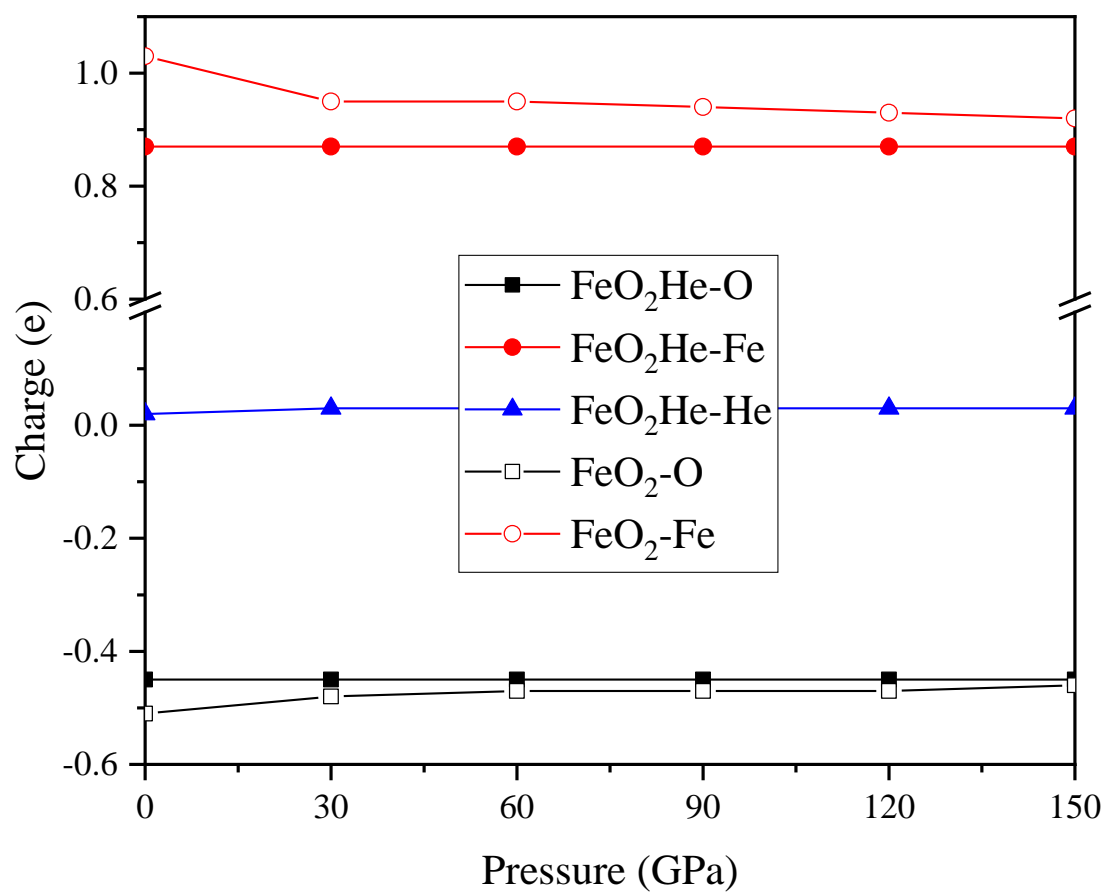

**Fig. S9.** Population analysis of FeO<sub>2</sub> and FeO<sub>2</sub>He at different pressures. A positive value represents the loss of electrons and a negative value represents the gain of electrons.



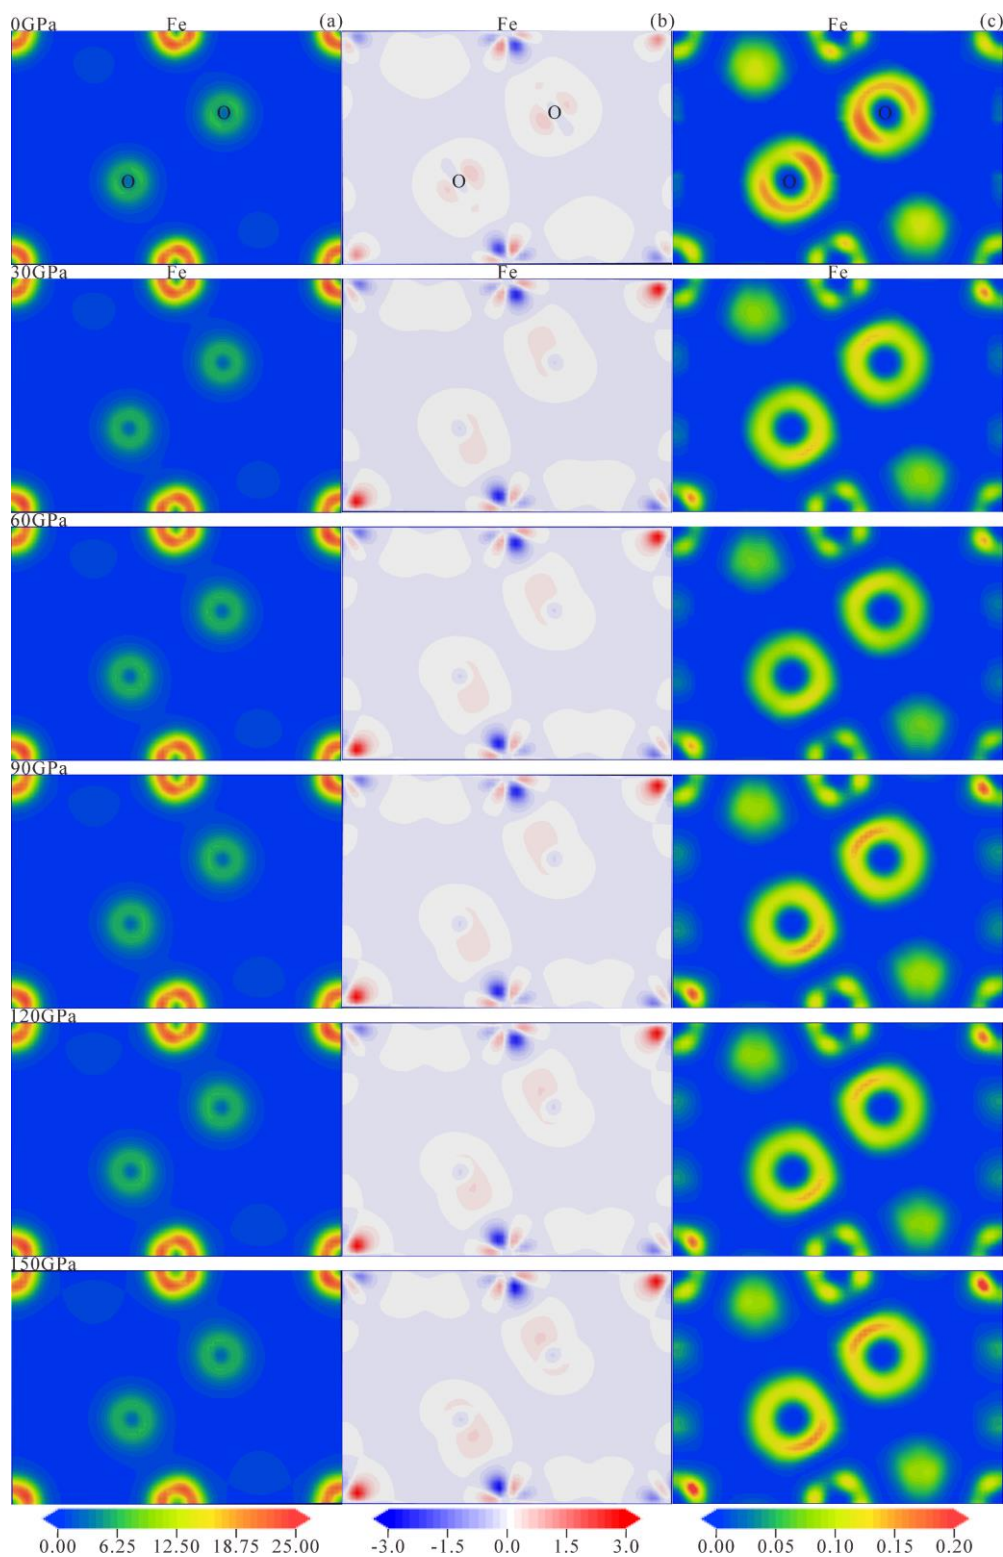

**Fig. S10.** (a) Electron density (left), (b) electron density difference (middle) and (c) electronic local function (right) of FeO<sub>2</sub> at different pressures. The red represents getting electrons and the blue represents losing electrons in the electron density difference.

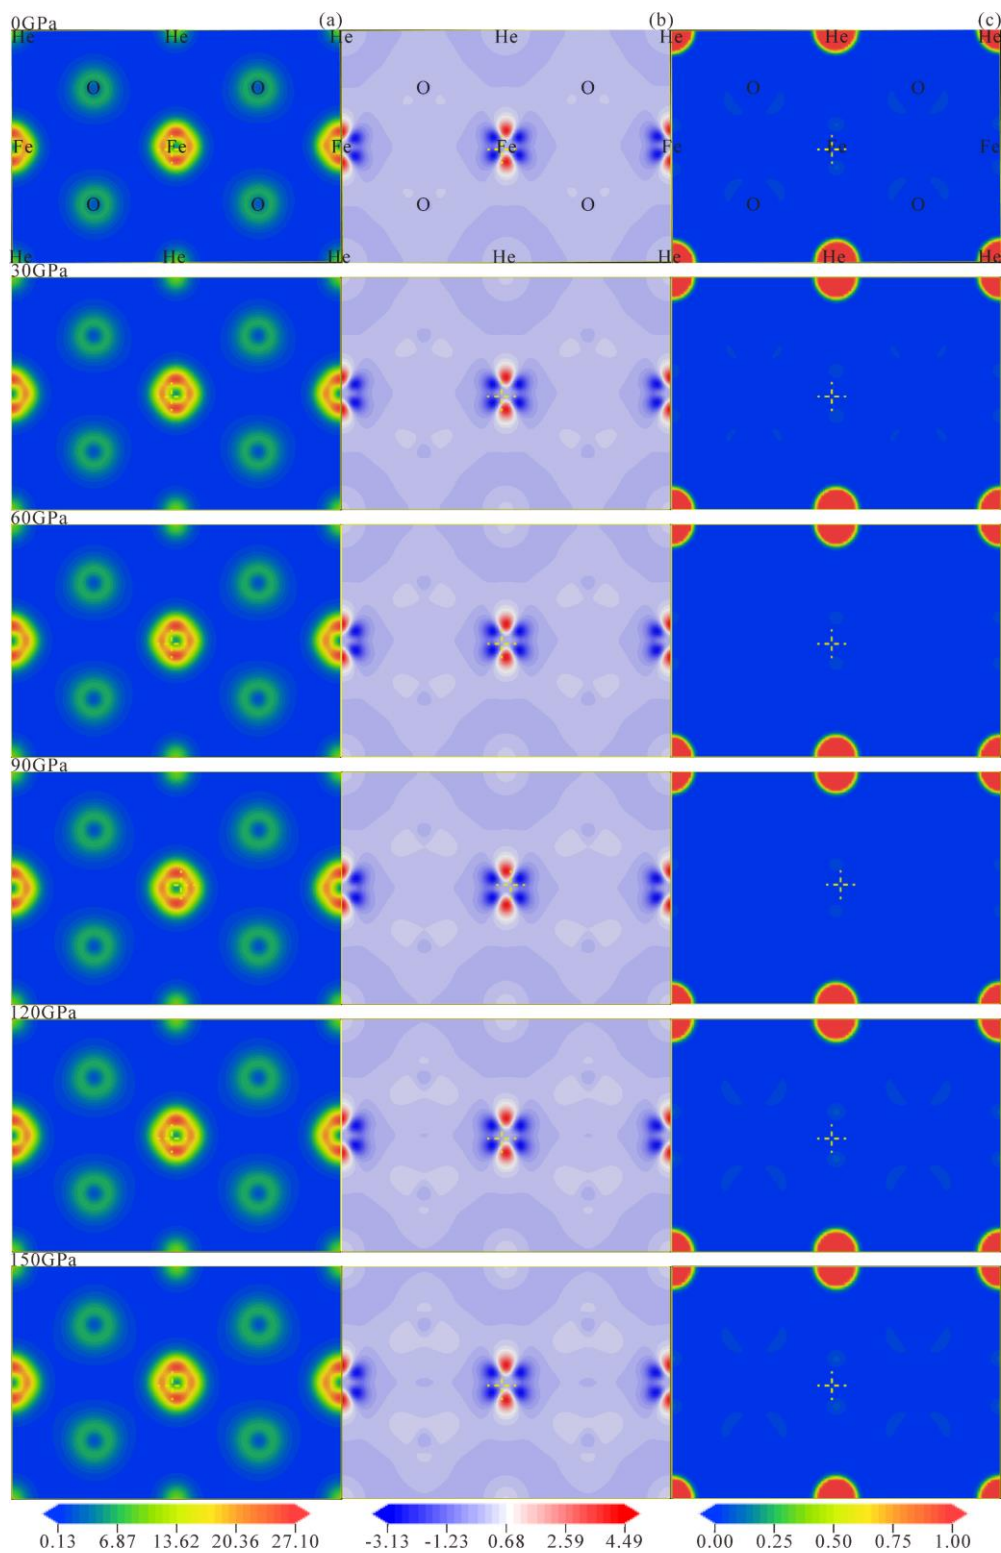

**Fig. S11.** (a) Electron density (left), (b) electron density difference (middle) and (c) electronic local function (right) of FeO<sub>2</sub>He at different pressures. The red represents getting electrons and the blue represents losing electrons in the electron density difference.

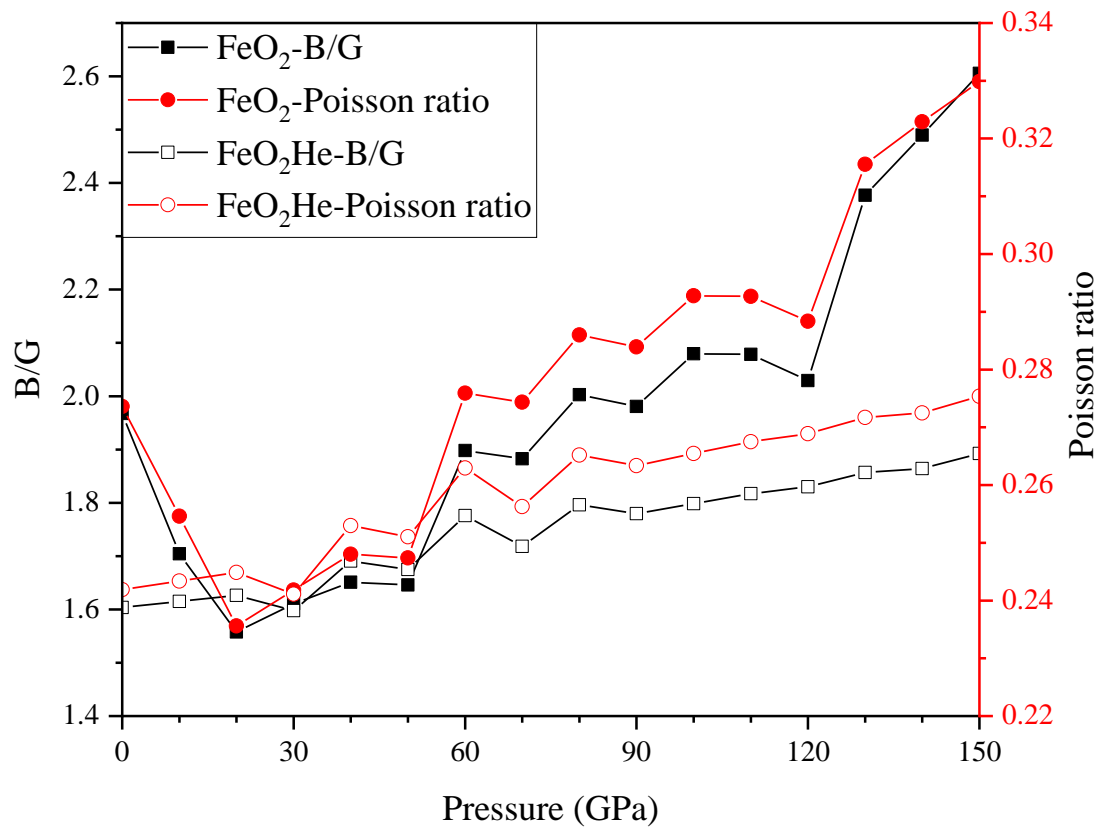

**Fig. S12.** Poisson's ratio and Pugh ratio of FeO<sub>2</sub> and FeO<sub>2</sub>He at different pressures.

## References

- Duan, Y., Sun, N., Wang, S., Li, X., Guo, X., Ni, H., Prakapenka, V.B., Mao, Z., 2018. Phase stability and thermal equation of state of  $\delta$ -AlOOH: Implication for water transportation to the Deep Lower Mantle. *Earth Planet. Sci. Lett.* 494, 92-98.
- Fine, M.E., Brown, L.D., Marcus, H.L., 1984. Elastic constants versus melting temperature in metals. *Scr. Metall.* 18, 951-956.
- Hu, Q., Kim, D.Y., Yang, W., Yang, L., Meng, Y., Zhang, L., Mao, H.K., 2016. FeO<sub>2</sub> and FeOOH under deep lower-mantle conditions and Earth's oxygen-hydrogen cycles. *Nature* 534, 241-244.
- Jang, B.G., Kim, D.Y., Shim, J.H., 2017. Metal-insulator transition and the role of electron correlation in FeO<sub>2</sub>. *Phys. Rev. B* 95, 075144.
- Litasov, K., Ohtani, E., 2002. Phase relations and melt compositions in CMAS–pyrolite–H<sub>2</sub>O system up to 25 GPa. *Phys. Earth Planet. Inter.* 134, 105-127.
- Lu, C., Amsler, M., Chen, C., 2018. Unraveling the structure and bonding evolution of the newly discovered iron oxide FeO<sub>2</sub>. *Phys. Rev. B* 98, 054102.
- Shorikov, A.O., Poteryaev, A.I., Anisimov, V.I., Streltsov, S.V., 2018. Hydrogenation-driven formation of local magnetic moments in FeO<sub>2</sub>H<sub>x</sub>. *Phys. Rev. B* 98, 165145.
- Zhang, J., Lv, J., Li, H., Feng, X., Lu, C., Redfern, S.A.T., Liu, H., Chen, C., Ma, Y., 2018. Rare helium-bearing compound FeO<sub>2</sub>He stabilized at deep-Earth conditions. *Phys. Rev. Lett.* 121, 255703.
- Zhang, X.L., Niu, Z.W., Tang, M., Zhao, J.Z., Cai, L.C., 2017. First-principles thermoelasticity and stability of pyrite-type FeO<sub>2</sub> under high pressure and

temperature. J. Alloys Compd. 719, 42-46.
